# Supplementary material for: Pro-fibrotic Fcer1g-expressing mesenchymal cells induced by macrophages during wound healing
Source: Research Square preprint supplement (doi:10.21203/rs.3.rs-6373202/v1), 2025-04-10
Supplement: Supplementary file 1 [file 62d1fa9a063127ddbde42f38.pdf]

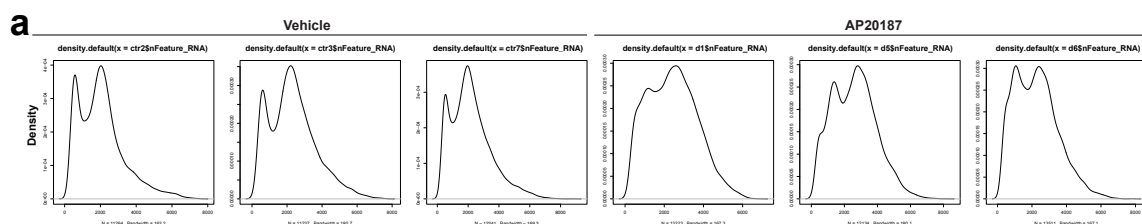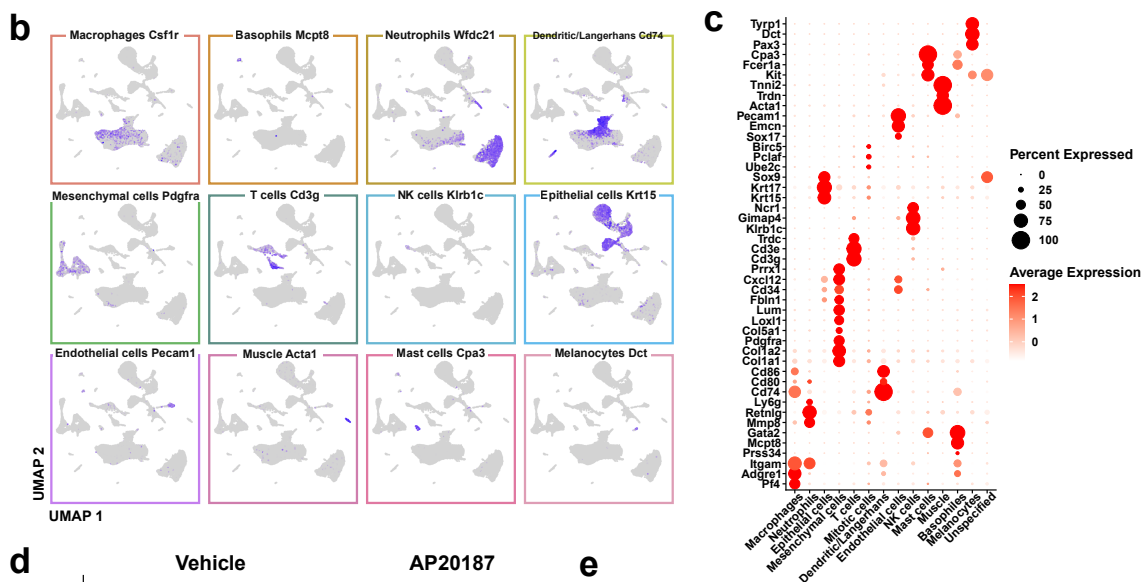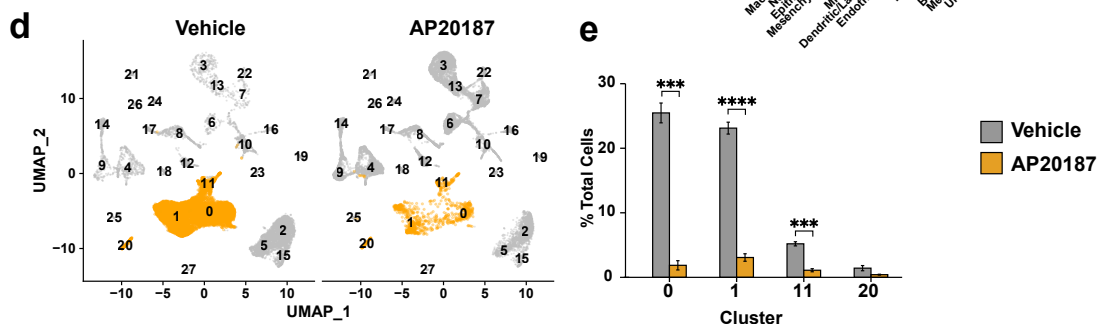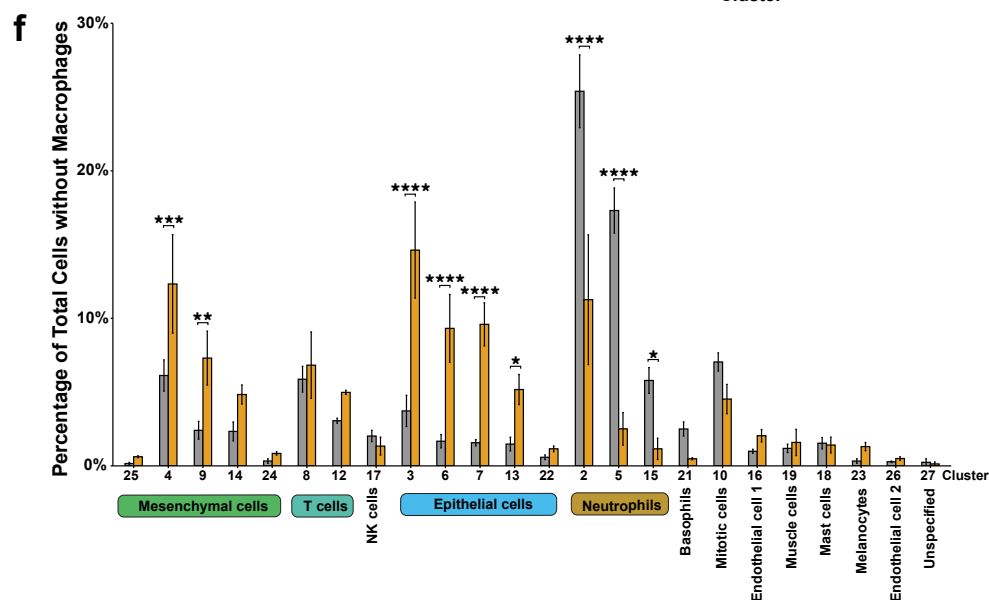



**Supplementary Figure 1.**

**a**, Density plots of Cell Ranger outputs for 3 dpi MaFIA wound cells treated with vehicle or AP20187.

**b**, Expression of key marker genes used to annotate all cell types in the MaFIA wound.

**c**, Expression of the key marker genes recovered by differential expression analysis for all cell types in the MaFIA wound.

**d**, Split UMAP of wounds treated with vehicle and AP20187 (n = 3 per condition); macrophage population highlighted in yellow.

**e**, Quantitative analysis of macrophage percentage over total cells (2-way repeated measures ANOVA).

**f**, Quantitative analysis of the percentage of each cell type over total cells (excluding macrophages) in the wounds treated with vehicle and AP20187 (2-way repeated measures ANOVA).

\*P < 0.05, \*\*P < 0.01, \*\*\*P < 0.001, \*\*\*\*P < 0.0001. Data are presented as mean ± s.d.

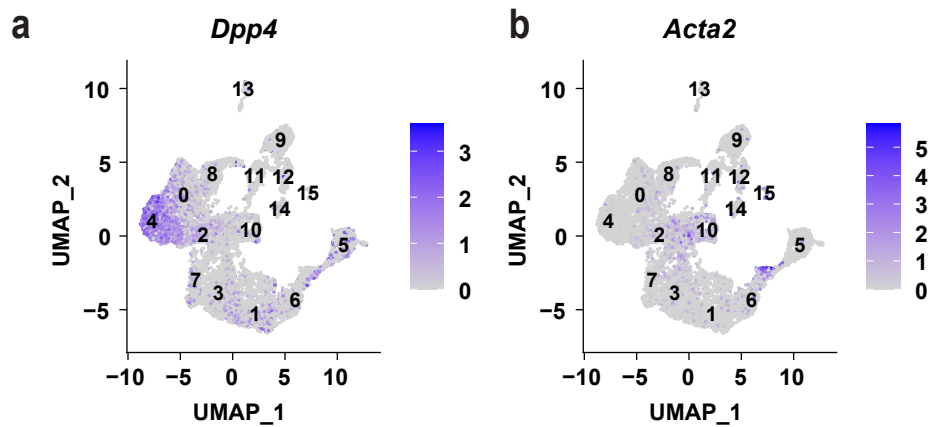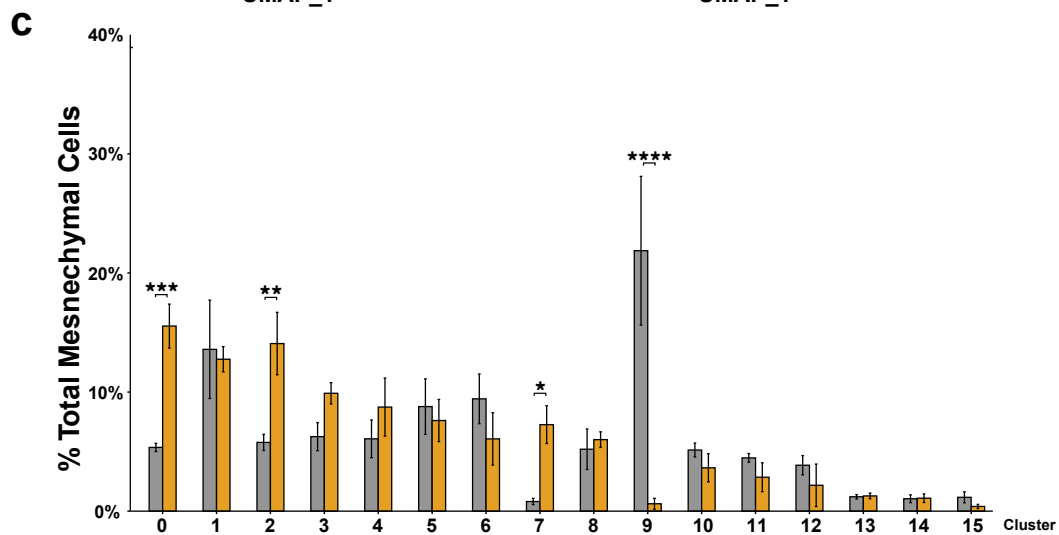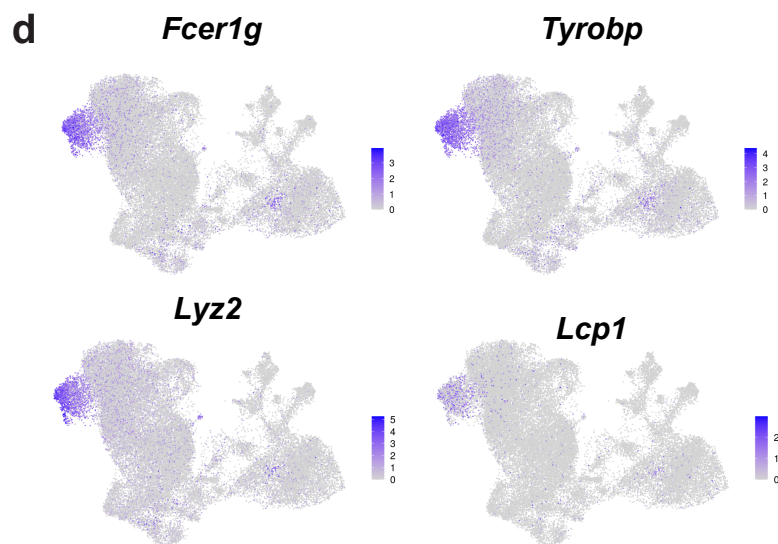

**Supplementary Figure 2.**

**a**, Expression of *Dpp4* in mesenchymal subclusters.

**b**, Expression of *Acta2* in mesenchymal subclusters.

**c**, Quantitative analysis of the percentage of each mesenchymal cell subtype over total mesenchymal cells (2-way repeated measures ANOVA).

**d**, Expression of *Fcer1g*, *Tyrobp*, *Lyz2* and *Lcp1* in a published time-course scRNA-seq data on wound healing.

**a**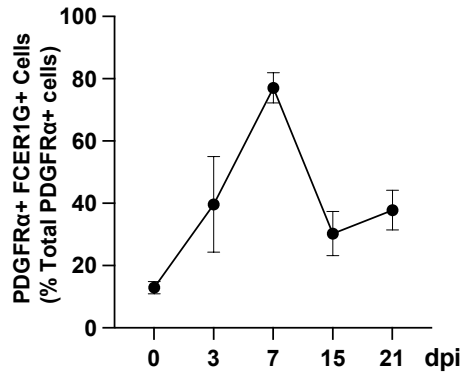**b**

7 dpi

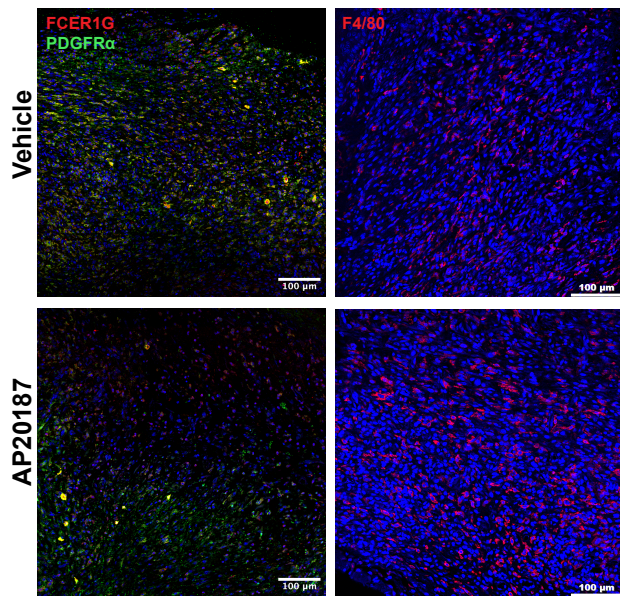**c**

14 dpi

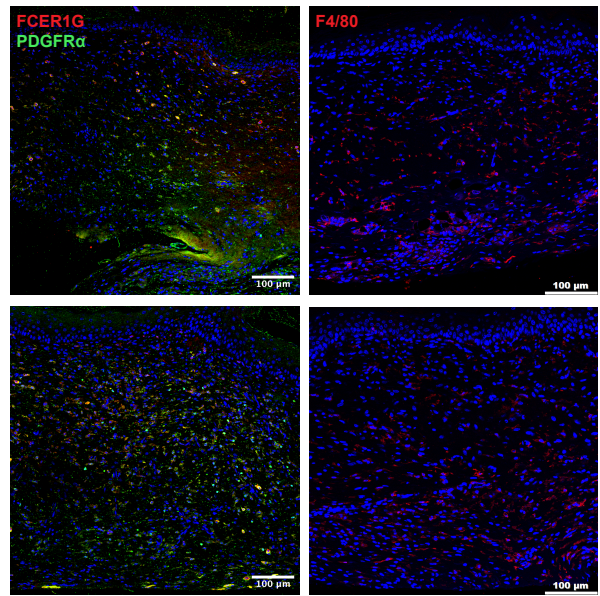**Supplementary Figure 3.**

**a**, Percentage of FCER1G<sup>+</sup> PDGFR $\alpha$ <sup>+</sup> cells over PDGFR $\alpha$ <sup>+</sup> cells over time during wound healing (n = 2 for unwounded, 15 dpi and 21 dpi; n = 3 for 3 dpi and 7 dpi).

**b-c**, Representative immunofluorescence images of FCER1G, PDGFR $\alpha$ , F4/80 staining of 7 dpi (**b**) and 14 dpi (**c**) wounds from MaFIA treated with vehicle and AP20187 (n=3 per condition for 7 dpi wounds; n=3 for 14 dpi vehicle-treated wounds; n=2 for 14 dpi AP20187-treated wounds).

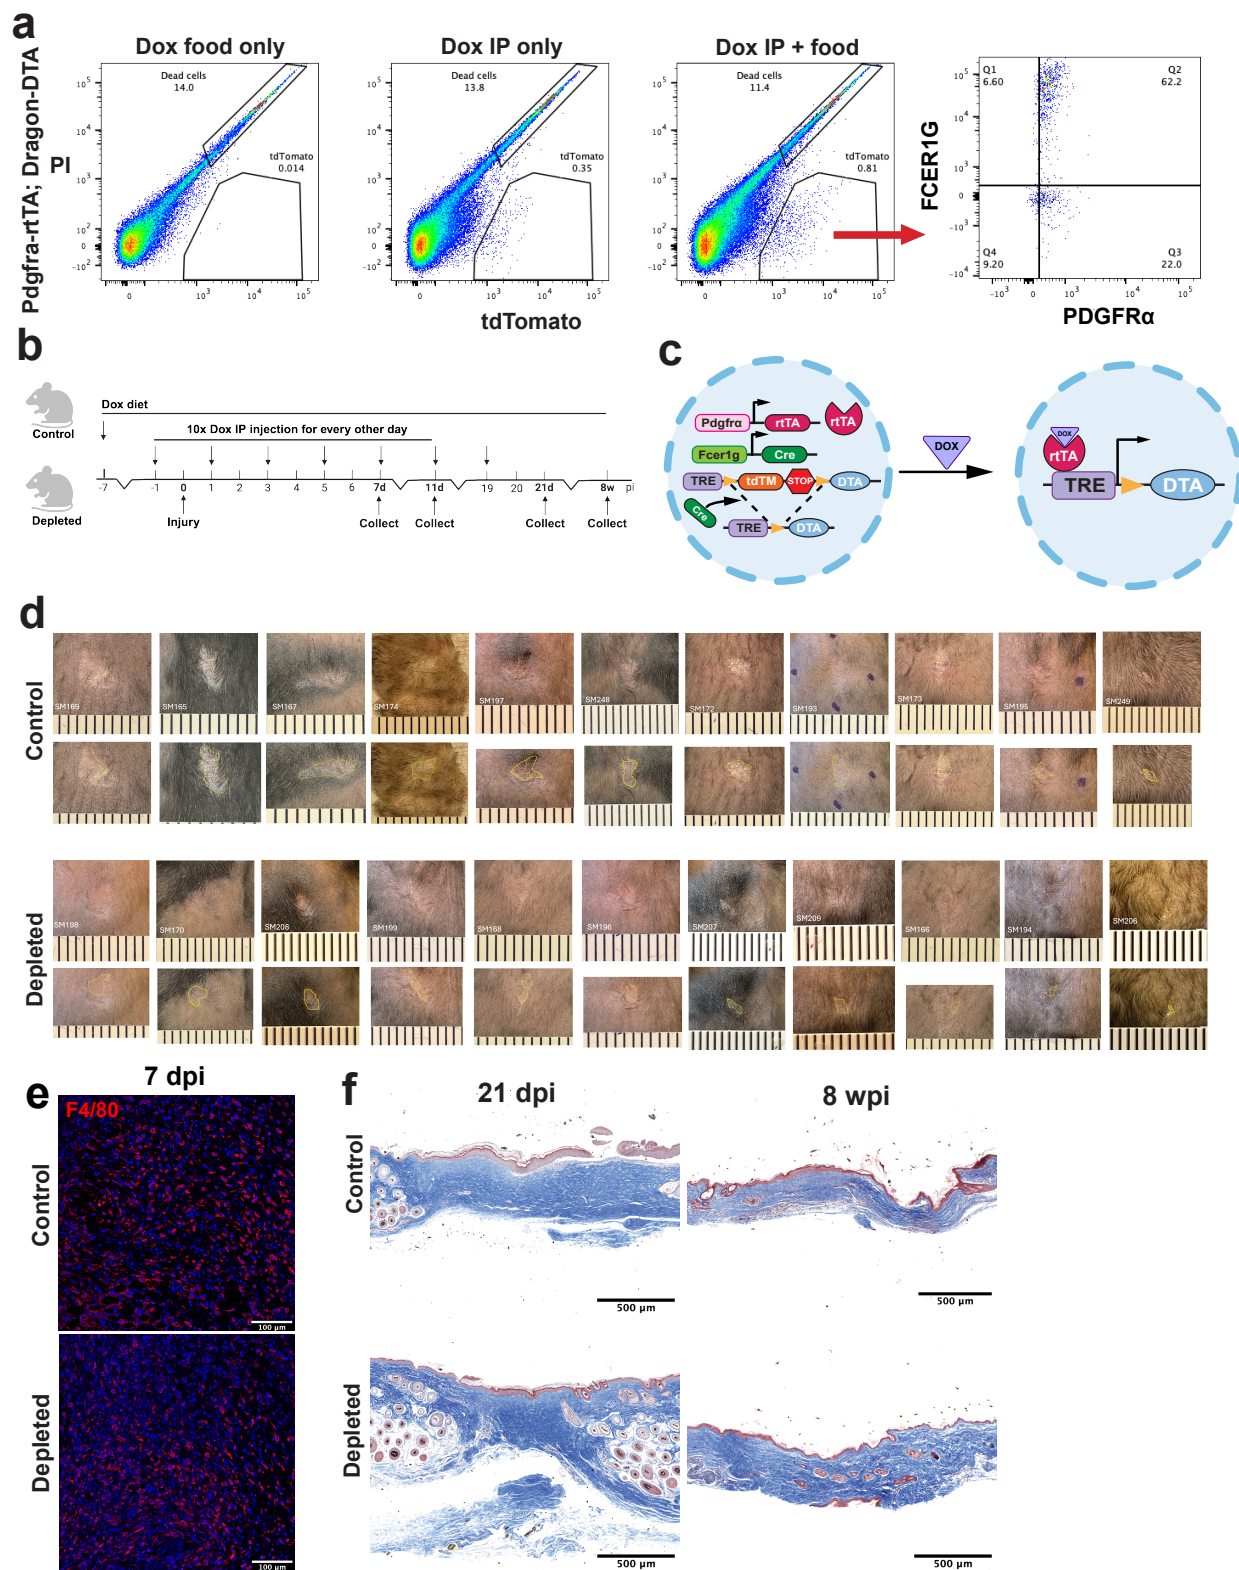

#### **Supplementary Figure 4.**

**a**, Left: FACS analysis of PI and tdTomato expression in skin cells collected from 7dpi *Pdgfra*-rtTA; Dragon-DTA mice treated with Dox food only, or Dox IP only, or Dox food and IP; Right: FACS analysis of FCER1G and PDGFR $\alpha$  expression of tdTomato<sup>+</sup> PI<sup>-</sup> skin cells from *Pdgfra*-rtTA; Dragon-DTA mice treated with Dox food and IP.

**b**, Schematic of experiment design.

**c**, Schematic of the *Pdgfra*-rtTA; *Fcer1g*Cre; Dragon-DTA mouse, which allows DTA-mediated ablation of *Fcer1g*-and *Pdgfra*-expressing cells upon Dox administration.

**d**, Macroscopic appearance of scars in control and depleted groups at 8wpi. Top row: raw photo; Bottom row: scars contoured for measurement.

**e**, Representative immunofluorescent images of 7 dpi wounds stained with F4/80 in control and depleted groups (control: n = 3, depleted: n = 4).

**f**, Masson's trichrome-stained sections from control and depleted groups at 21 dpi and 8 wpi (n=11 per time point).

**a**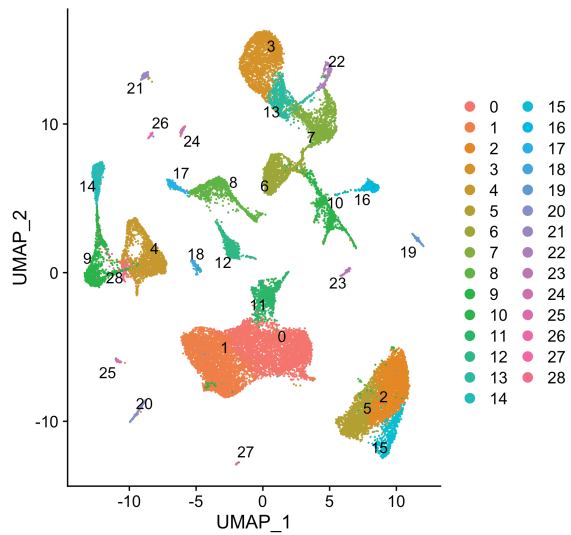**b**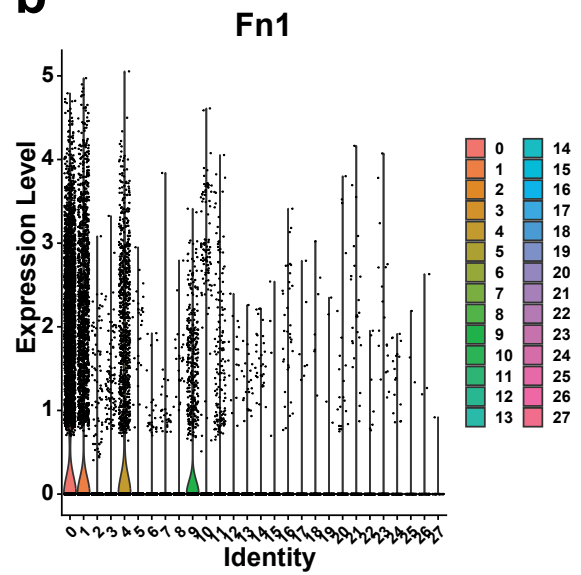**Supplementary Figure 5.**

**a**, UMAP of cell clusters in MaFIA wounds at 3 dpi with *Fcer1g*-expressing population mapped back as cluster 28.

**b**, Violin plot showing *Fn1* expression across all clusters.

| Cell type                 | Cluster      | Markers                                                 |
|---------------------------|--------------|---------------------------------------------------------|
| Basophil                  | 21           | Prss34, Mcpt8, Gata2                                    |
| Dendritic/Langerhans cell | 11,20        | Cd74, Cd80, Cd86,                                       |
| Endothelial cell 1        | 16           | Sox17, Emcn, Pecam1                                     |
| Endothelial cell 2        | 26           | Prox1, Ccl21a, Pecam1                                   |
| Epithelial cell           | 3,6,7,13,22  | Krt15, Krt17, Sox9                                      |
| Macrophage                | 0,1          | Pf4, Adgre1, Itgam                                      |
| Mast cell                 | 18           | Kit, Fcer1a, Cpa3                                       |
| Melanocyte                | 23           | Pax3, Dct, Tyrp1                                        |
| Mesenchymal cell          | 4,9,14,24,25 | Col1a1, Col1a2, Pdgfra, Col5a1, Loxl1, Lum, Fbln1, Cd34 |
| Mitotic cell              | 10           | Ube2c, Pclaf, Birc5                                     |
| Muscle                    | 19           | Acta1, Trdn, Tnni2                                      |
| Natural killer cell       | 17           | Klrb1c, Gimap4, Ncr1                                    |
| Neutrophil                | 2,5,15       | Mmp8, Retnlg, Ly6g                                      |
| T cell                    | 8,12         | Cd3g, Cd3e, Trdc                                        |

**Supplementary Table 1.** Markers used to annotate cell types in 3 dpi MaFIA wound single-cell data.
